# Supplementary material for: Synthesis and biological activity evaluation of N-protected isatin derivatives as inhibitors of ICAM-1 expression on human endothelial cells
Source: Royal Society of Chemistry journal article supplement (doi:10.1039/c0md00262c), 2011-01-01

Supplementary Material (ESI) for Organic & Biomolecular Chemistry  
This journal is (c) The Royal Society of Chemistry 2011

## Synthesis and biological evaluation of *N*-protected isatin derivatives as inhibitors of ICAM-1 expression on human endothelial cells

**Shashwat Malhotra<sup>a</sup>, Sakshi Balwani<sup>b</sup>, Ashish Dhawan<sup>a</sup>, Brajendra K. Singh<sup>a</sup>, Sarvesh Kumar<sup>b,c</sup>, Rajesh Thimmulappa<sup>c</sup>, Shyam Biswal<sup>c</sup>, Ashok K. Prasad<sup>a</sup>, Balaram Ghosh<sup>b\*</sup> and Virinder S. Parmar<sup>a\*</sup>**

<sup>a</sup>*Bioorganic Laboratory, Department of Chemistry, University of Delhi, Delhi-110 007, India;*  
<sup>b</sup>*Molecular Immunogenetics Laboratory, Institute of Genomics and Integrative Biology, Mall Road, Delhi-110 007, India;* <sup>c</sup>*Department of Environmental Health Sciences, Bloomberg School of Public Health, Johns Hopkins University, Baltimore, Maryland 21205, USA.*

### Table of Contents

1. <sup>1</sup>H-NMR and <sup>13</sup>C-NMR spectra of compounds **3b**, **3c**, **3d**, **3e**, **3f**, **3g**, **3h**, **3i**, **3j**, **3l**, **3m**, **3n**, **3o** and **3p**.
2. NOE 1H-NMR spectra of compounds **2a**, **2b**, **2c** and **2d**.
3. NOESY 1H-NMR spectra of compounds **2a**, **2b**, **2c** and **2d**.

Supplementary Material (ESI) for Organic & Biomolecular Chemistry  
This journal is (c) The Royal Society of Chemistry 2011

$^1\text{H}$  NMR spectrum (Bruker AC-300 Avance, 300 MHz,  $\text{CDCl}_3$ ) of compound **3b**

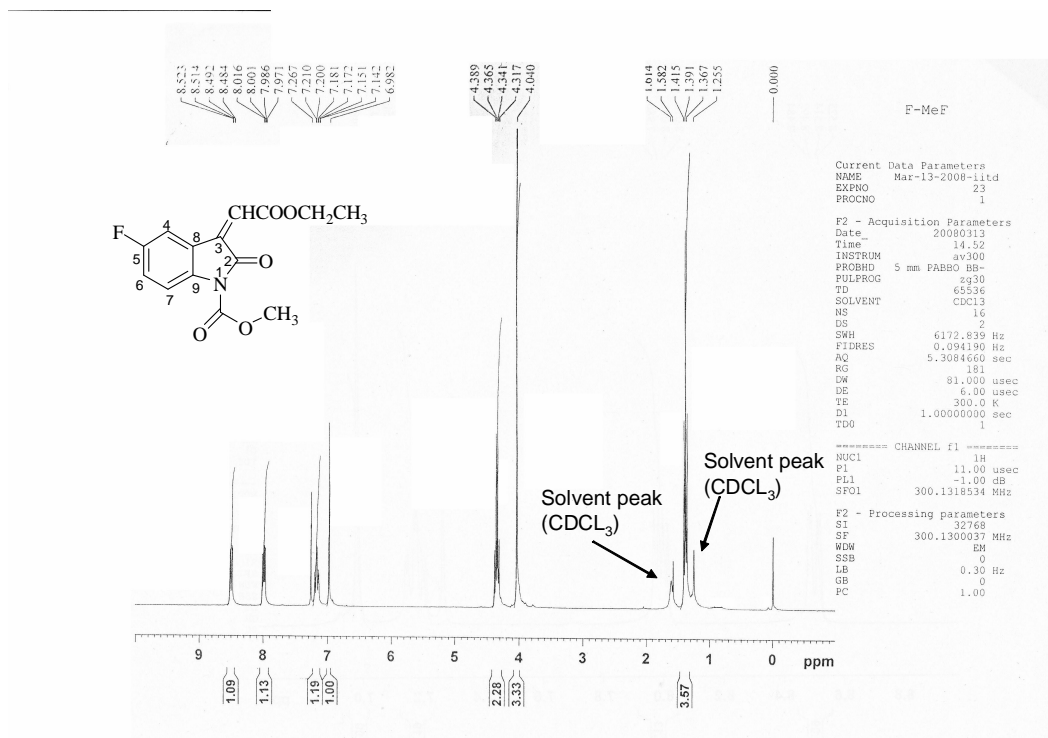

$^{13}\text{C}$  NMR spectrum (Bruker AC-300 Avance, 75.5 MHz,  $\text{CDCl}_3$ ) of compound **3b**

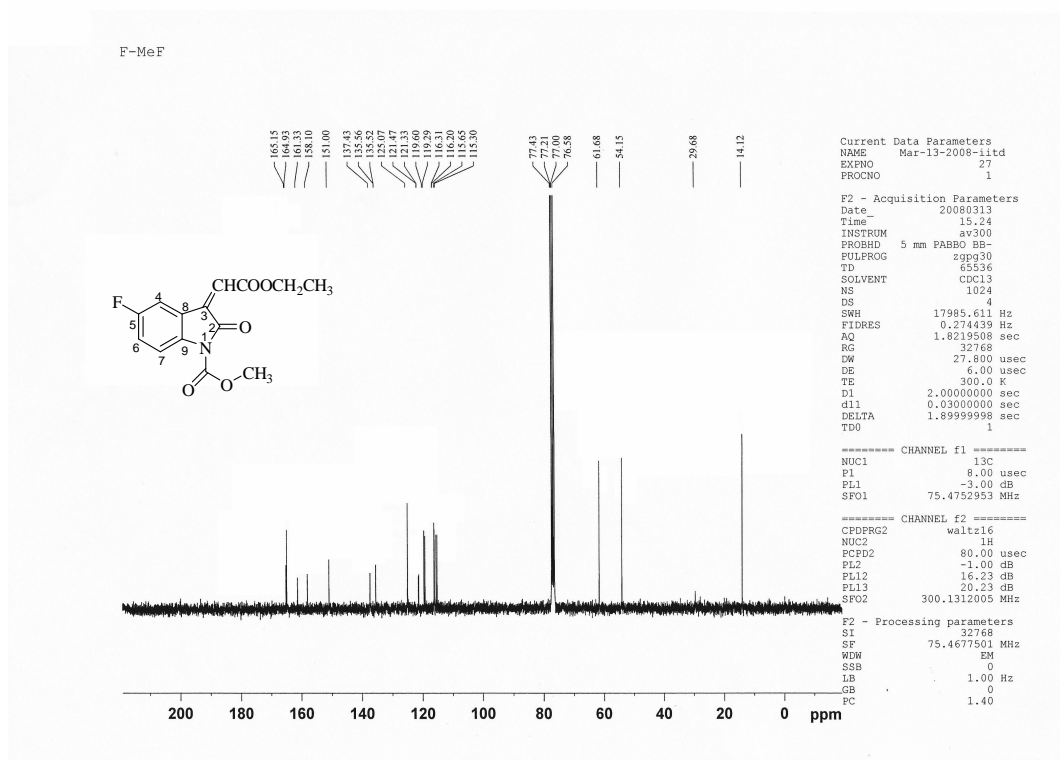

Supplementary Material (ESI) for Organic & Biomolecular Chemistry  
This journal is (c) The Royal Society of Chemistry 2011

### $^1\text{H}$ NMR spectrum (Bruker AC-300 Avance, 300 MHz, $\text{CDCl}_3$ ) of compound **3c**

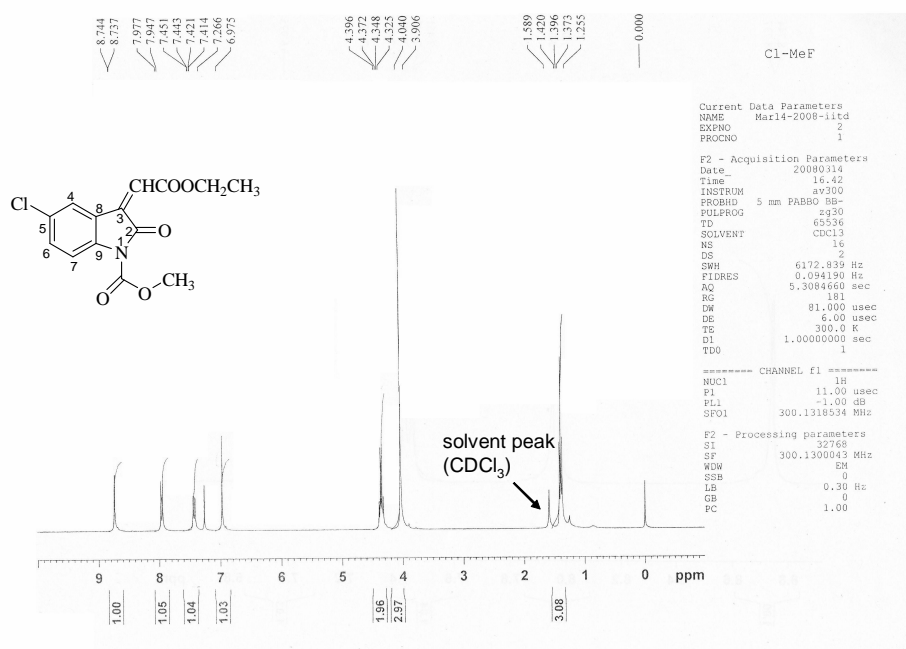

### $^{13}\text{C}$ NMR spectrum (Bruker AC-300 Avance, 75.5 MHz, $\text{CDCl}_3$ ) of compound **3c**

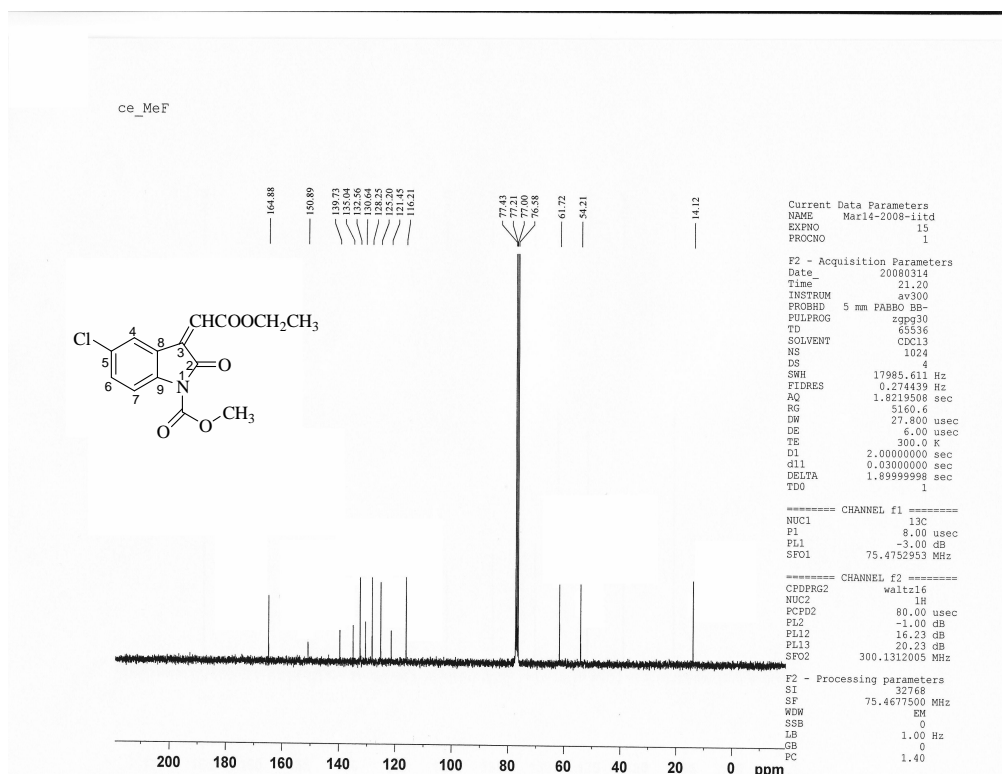

Supplementary Material (ESI) for Organic & Biomolecular Chemistry  
This journal is (c) The Royal Society of Chemistry 2011

<sup>1</sup>H NMR spectrum (Bruker AC-300 Avance, 300 MHz, CDCl<sub>3</sub>) of compound **3d**

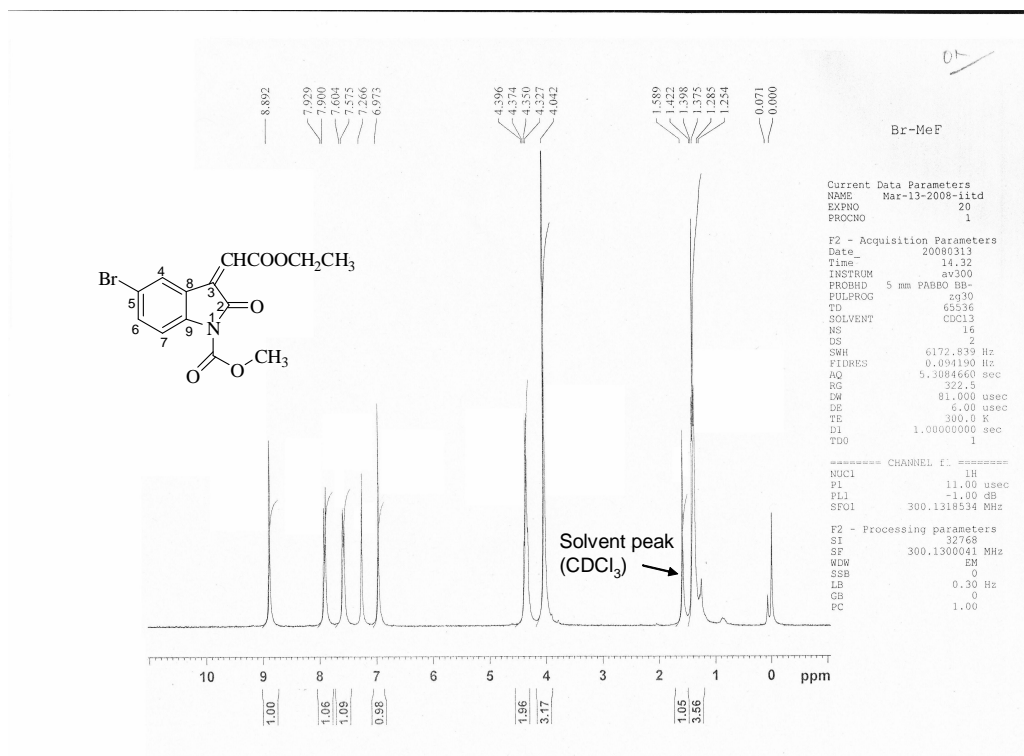

<sup>13</sup>C NMR spectrum (Bruker AC-300 Avance, 75.5 MHz, CDCl<sub>3</sub>) of compound **3d**

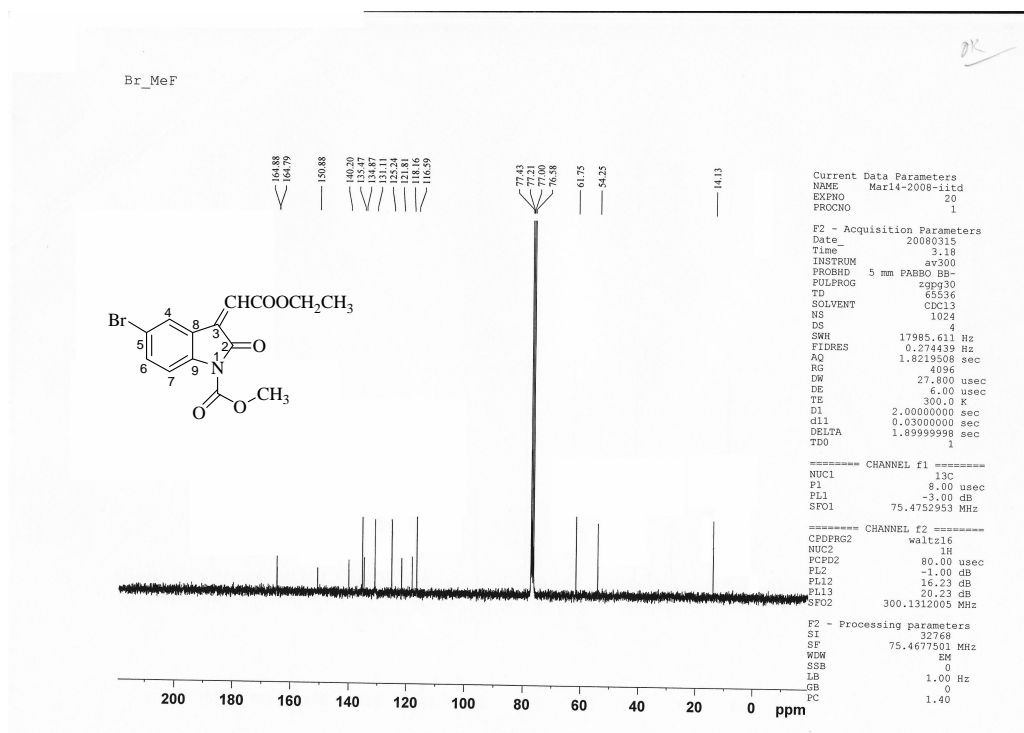

Supplementary Material (ESI) for Organic & Biomolecular Chemistry  
 This journal is (c) The Royal Society of Chemistry 2011

<sup>1</sup>H NMR spectrum (Bruker AC-300 Avance, 300 MHz, CDCl<sub>3</sub>) of compound **3e**

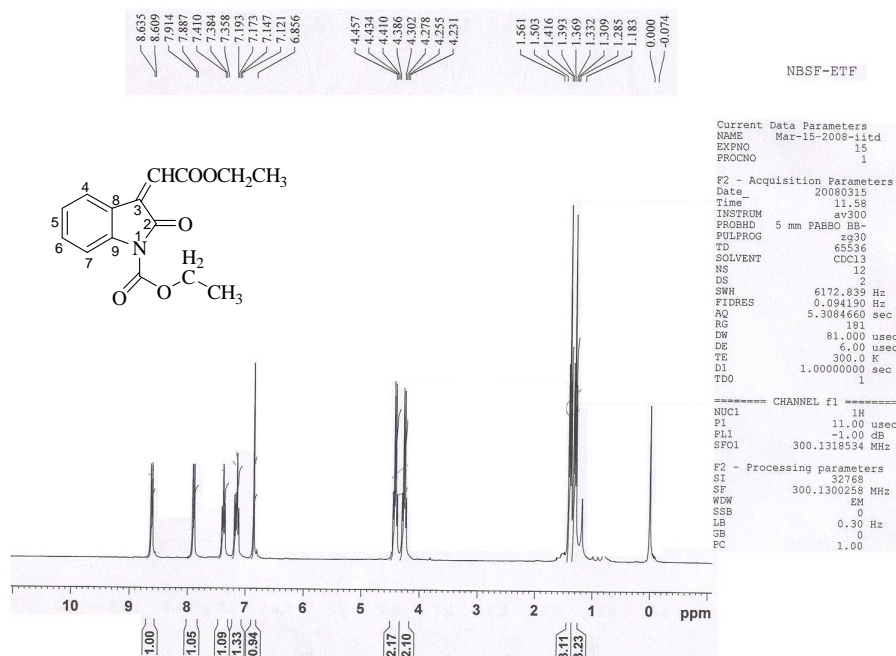

<sup>13</sup>C NMR spectrum (Bruker AC-300 Avance, 75.5 MHz, CDCl<sub>3</sub>) of compound **3e**

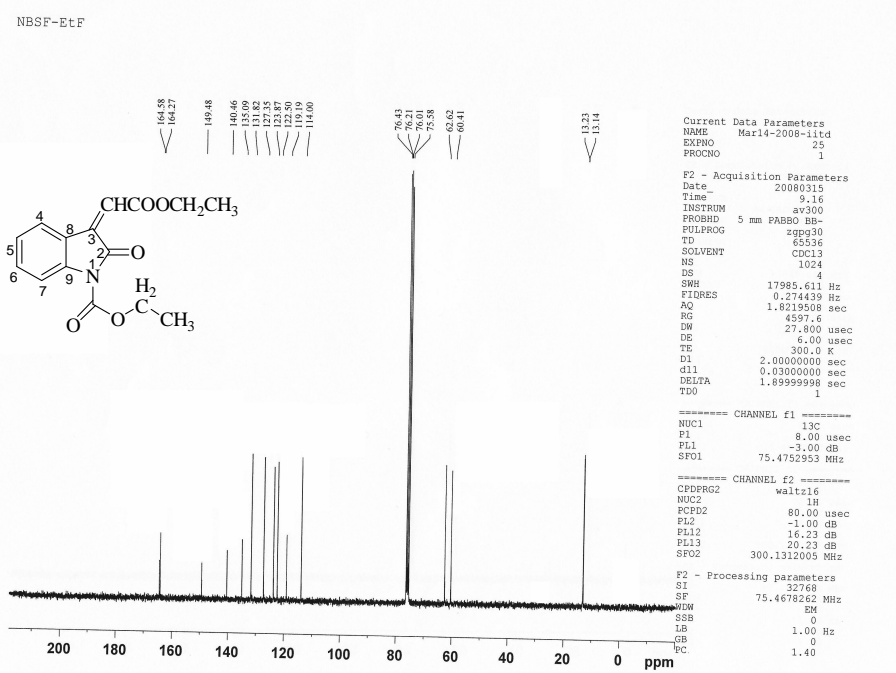

Supplementary Material (ESI) for Organic & Biomolecular Chemistry  
 This journal is (c) The Royal Society of Chemistry 2011

<sup>1</sup>H NMR spectrum (Bruker AC-300 Avance, 300 MHz, CDCl<sub>3</sub>) of compound **3f**

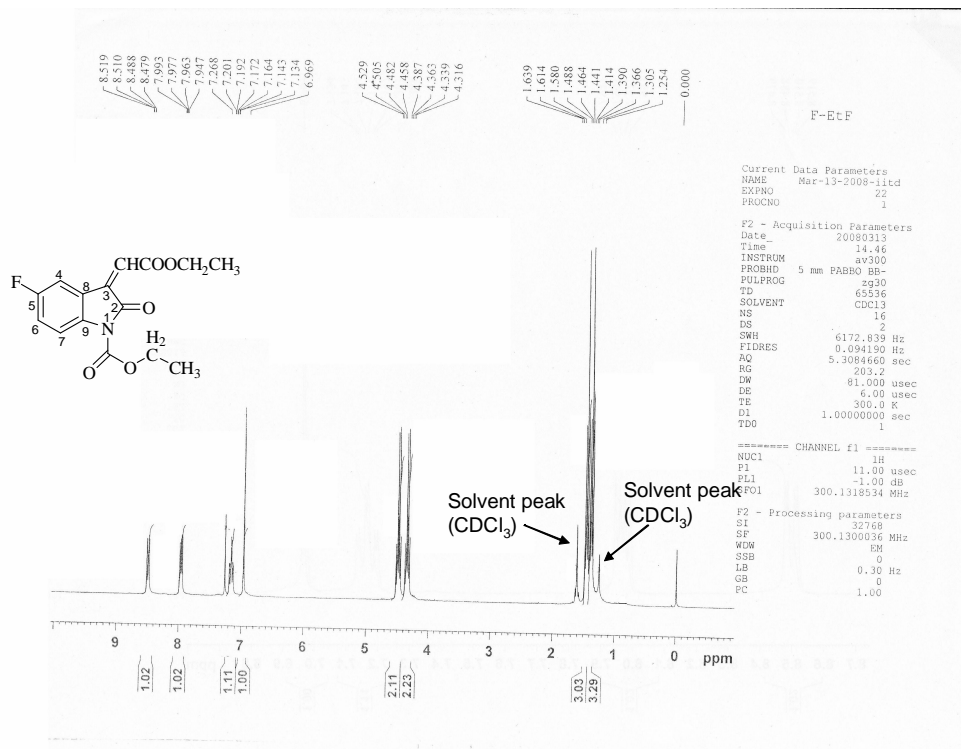

<sup>13</sup>C NMR spectrum (Bruker AC-300 Avance, 75.5 MHz, CDCl<sub>3</sub>) of compound **3f**

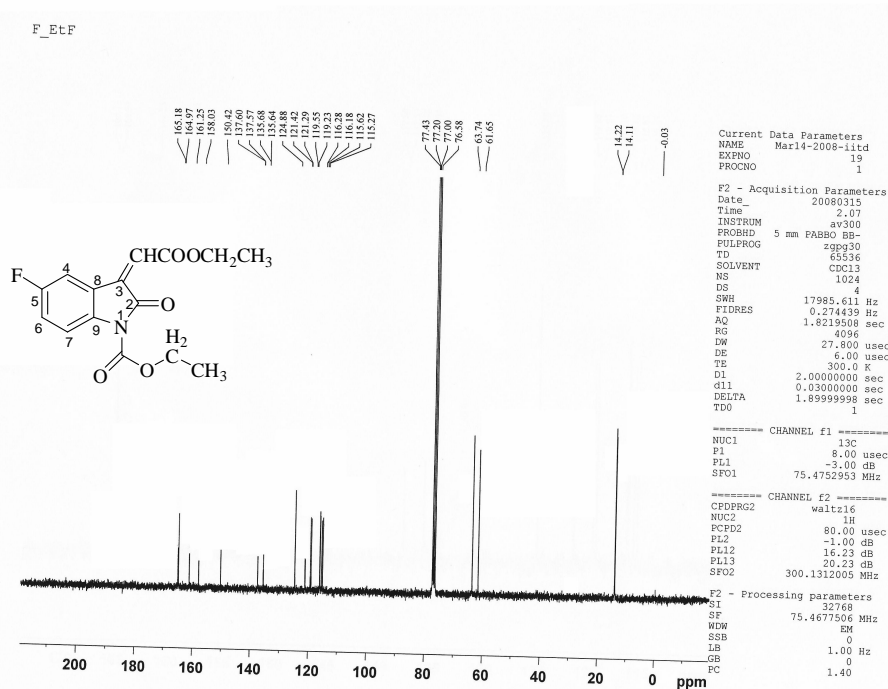

Supplementary Material (ESI) for Organic & Biomolecular Chemistry  
This journal is (c) The Royal Society of Chemistry 2011

$^1\text{H}$  NMR spectrum (Bruker AC-300 Avance, 300 MHz,  $\text{CDCl}_3$ ) of compound **3g**

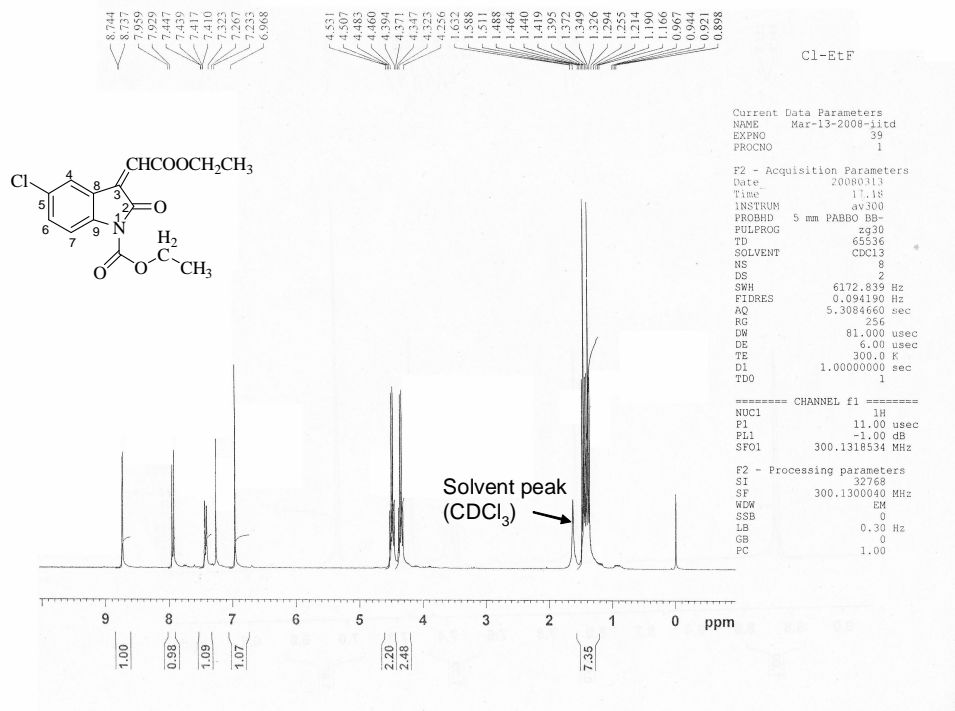

$^{13}\text{C}$  NMR spectrum (Bruker AC-300 Avance, 75.5 MHz,  $\text{CDCl}_3$ ) of compound **3g**

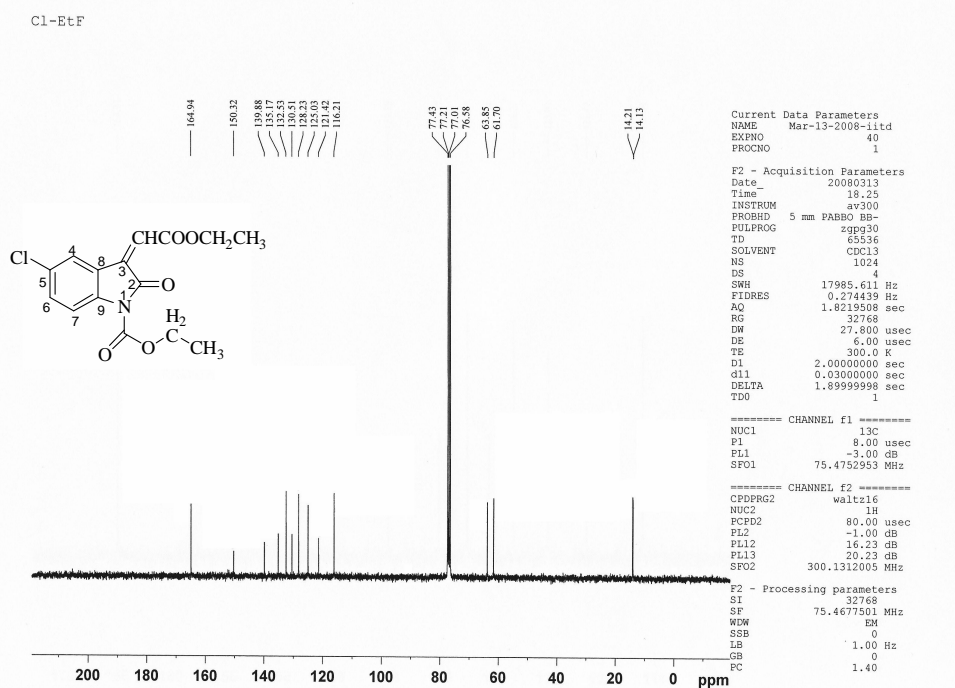

Supplementary Material (ESI) for Organic & Biomolecular Chemistry  
This journal is (c) The Royal Society of Chemistry 2011

$^1\text{H}$  NMR spectrum (Bruker AC-300 Avance, 300 MHz,  $\text{CDCl}_3$ ) of compound **3h**

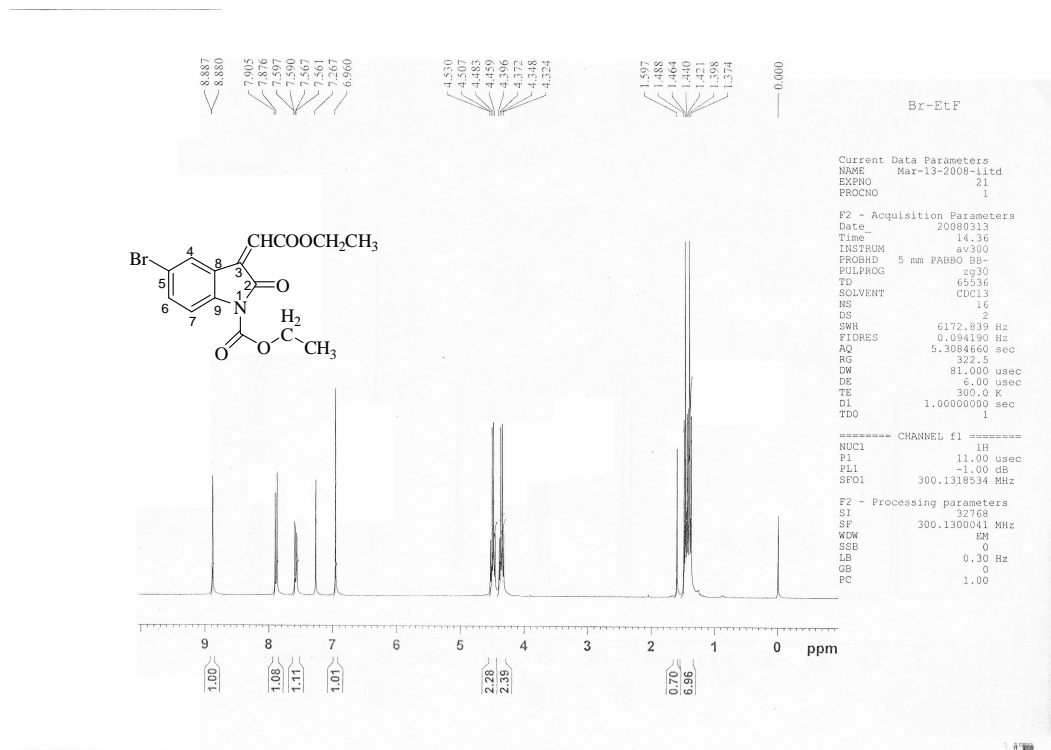

$^{13}\text{C}$  NMR spectrum (Bruker AC-300 Avance, 75.5 MHz,  $\text{CDCl}_3$ ) of compound **3h**

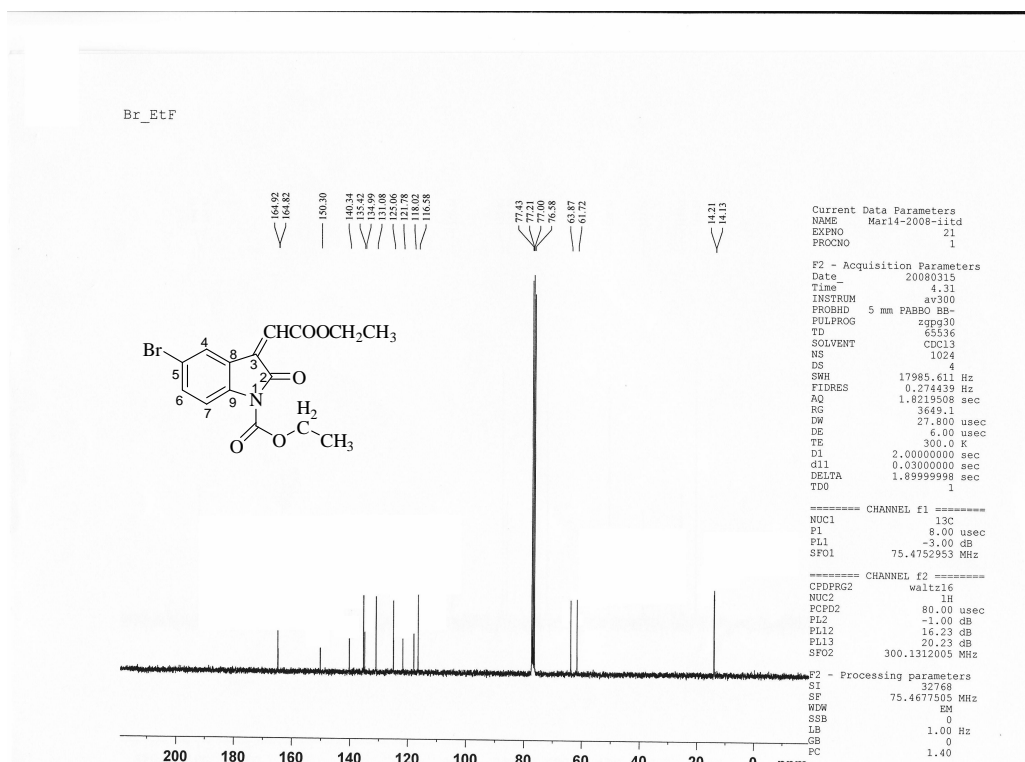



Supplementary Material (ESI) for Organic & Biomolecular Chemistry  
This journal is (c) The Royal Society of Chemistry 2011

$^1\text{H}$  NMR spectrum (Bruker AC-300 Avance, 300 MHz,  $\text{CDCl}_3$ ) of compound **3i**

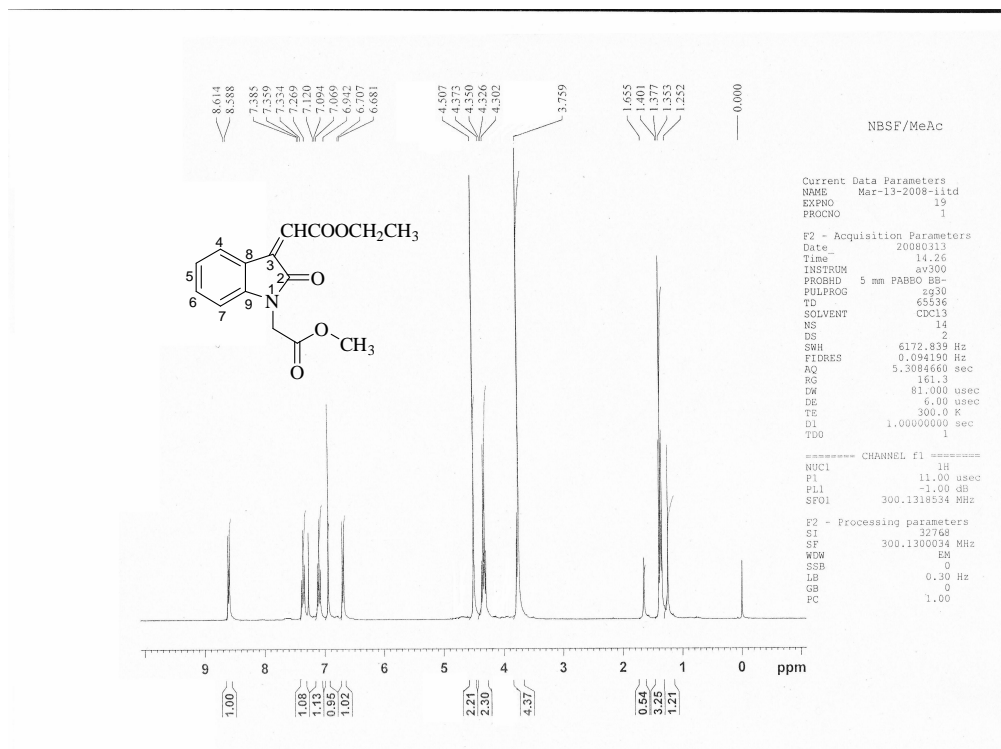

$^{13}\text{C}$  NMR spectrum (Bruker AC-300 Avance, 75.5 MHz,  $\text{CDCl}_3$ ) of compound **3i**

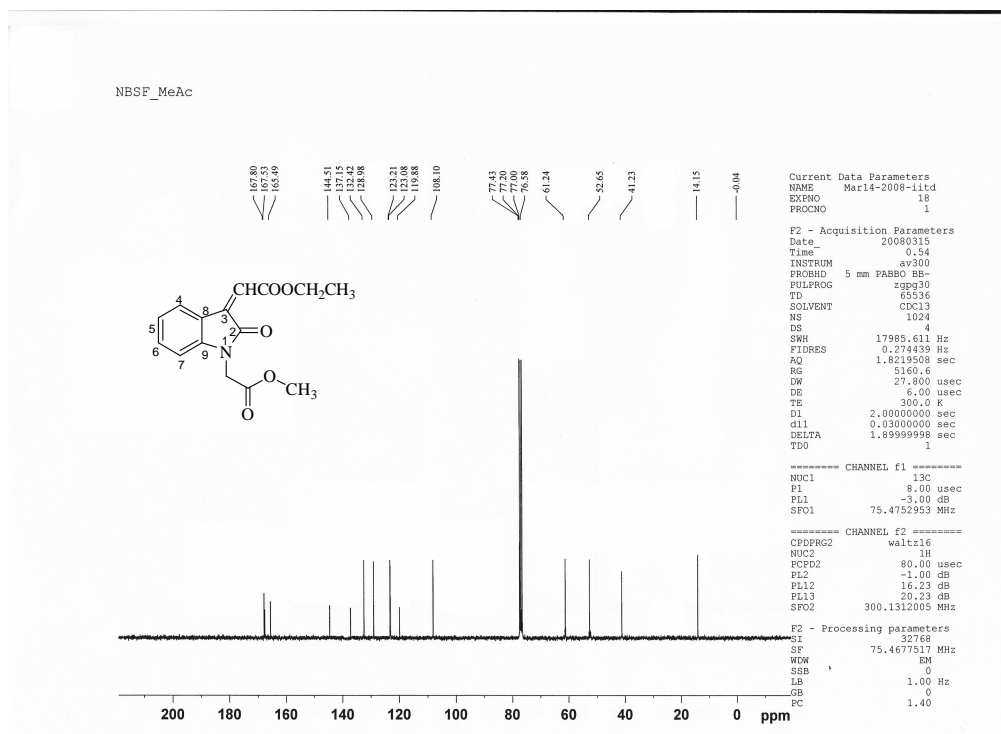

Supplementary Material (ESI) for Organic & Biomolecular Chemistry  
 This journal is (c) The Royal Society of Chemistry 2011

$^1\text{H}$  NMR spectrum (Bruker AC-300 Avance, 300 MHz,  $\text{CDCl}_3$ ) of compound **3j**

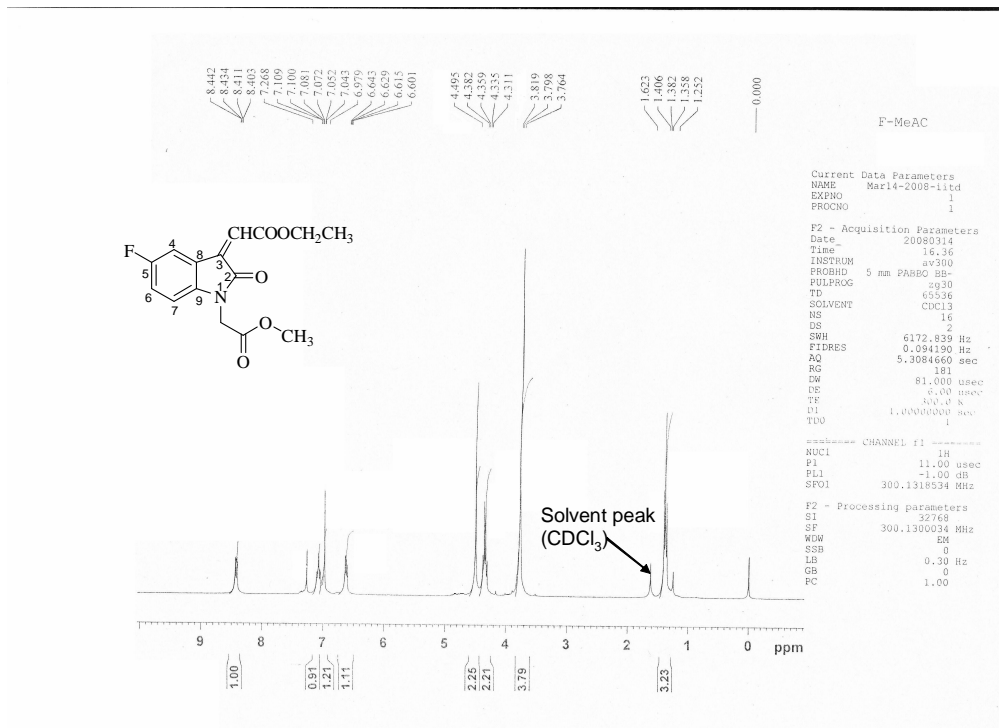

$^{13}\text{C}$  NMR spectrum (Bruker AC-300 Avance, 75.5 MHz,  $\text{CDCl}_3$ ) of compound **3j**

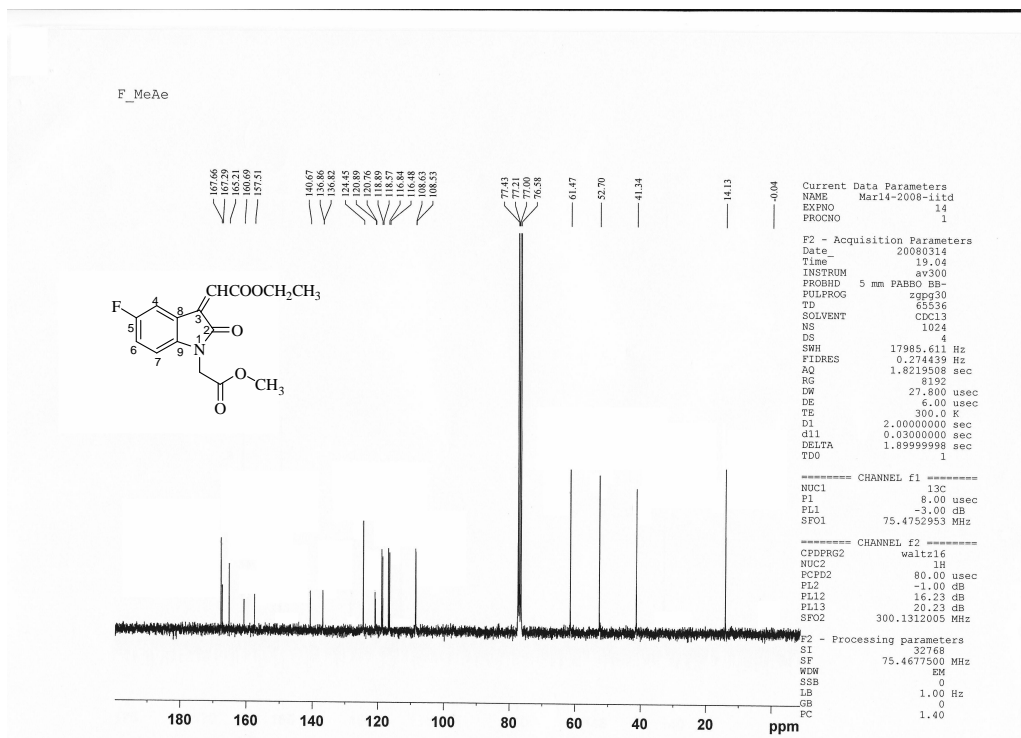

Supplementary Material (ESI) for Organic & Biomolecular Chemistry  
This journal is (c) The Royal Society of Chemistry 2011

$^1\text{H}$  NMR spectrum (Bruker AC-300 Avance, 300 MHz,  $\text{CDCl}_3$ ) of compound **31**

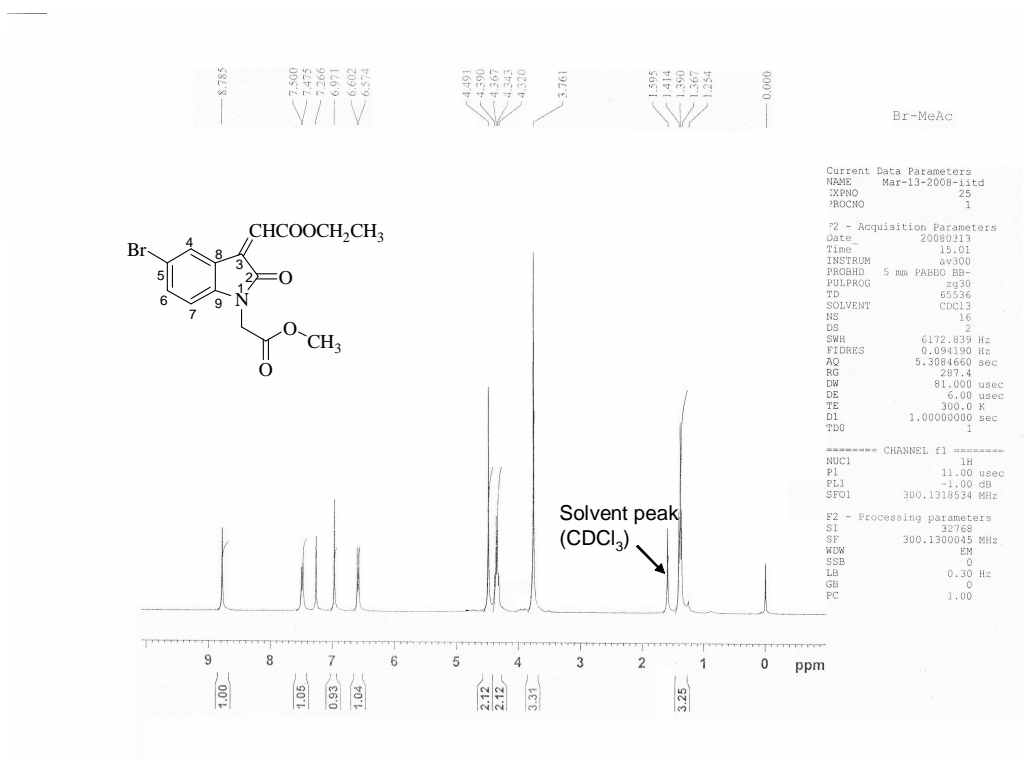

$^{13}\text{C}$  NMR spectrum (Bruker AC-300 Avance, 75.5 MHz,  $\text{CDCl}_3$ ) of compound **31**

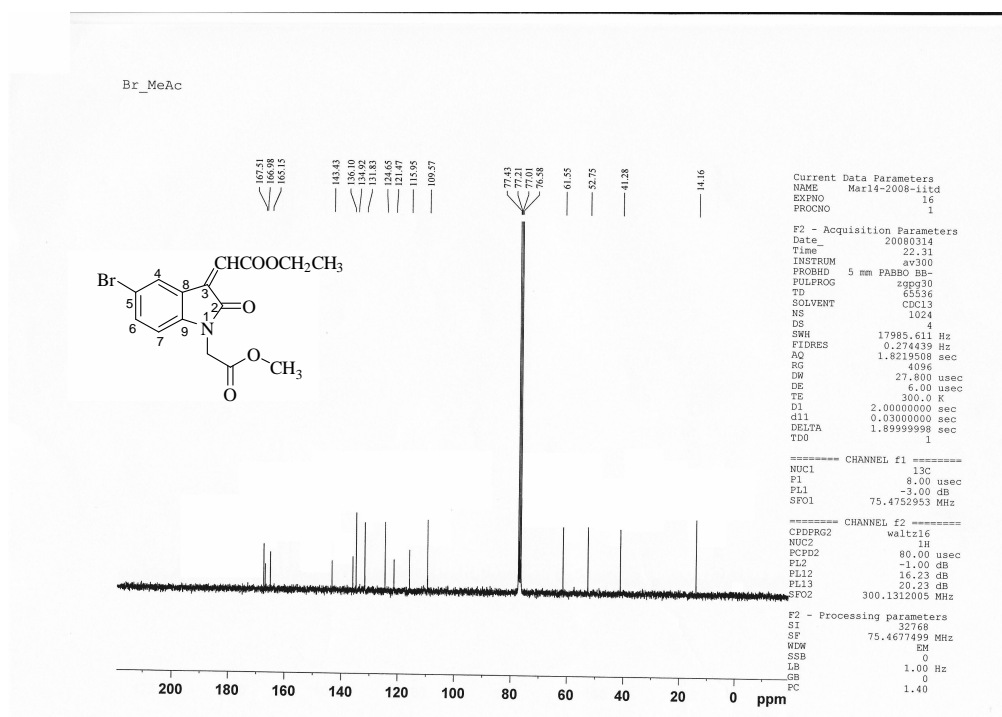

Supplementary Material (ESI) for Organic & Biomolecular Chemistry  
This journal is (c) The Royal Society of Chemistry 2011

$^1\text{H}$  NMR spectrum (Bruker AC-300 Avance, 300 MHz,  $\text{CDCl}_3$ ) of compound **3m**

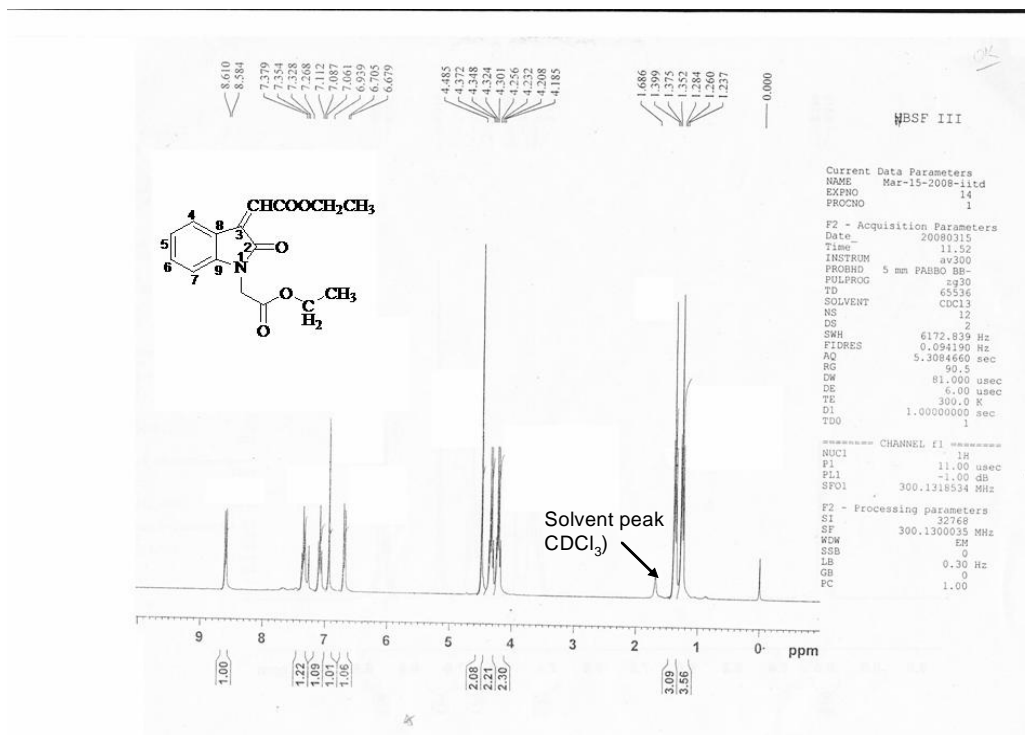

$^{13}\text{C}$  NMR spectrum (Bruker AC-300 Avance, 75.5 MHz,  $\text{CDCl}_3$ ) of compound **3m**

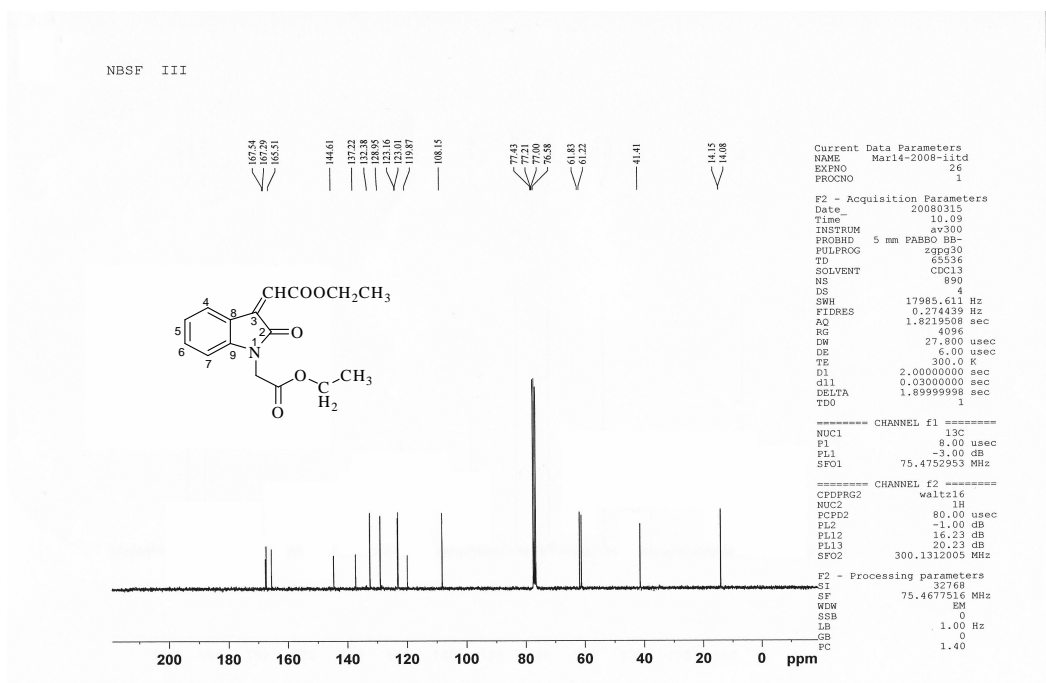

Supplementary Material (ESI) for Organic & Biomolecular Chemistry  
 This journal is (c) The Royal Society of Chemistry 2011

<sup>1</sup>H NMR spectrum (Bruker AC-300 Avance, 300 MHz, CDCl<sub>3</sub>) of compound **3n**

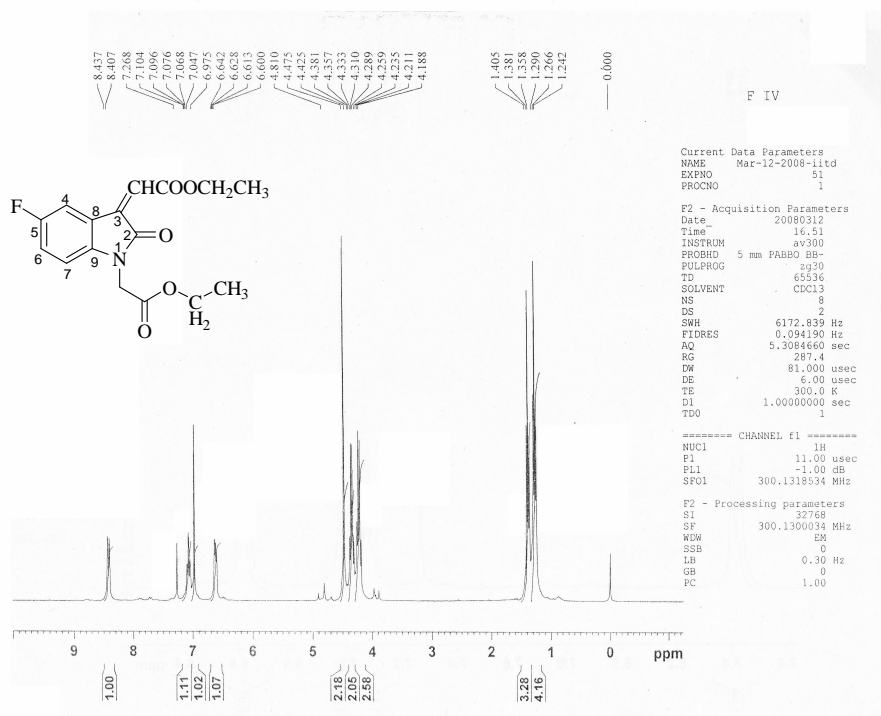

<sup>13</sup>C NMR spectrum (Bruker AC-300 Avance, 75.5 MHz, CDCl<sub>3</sub>) of compound **3n**

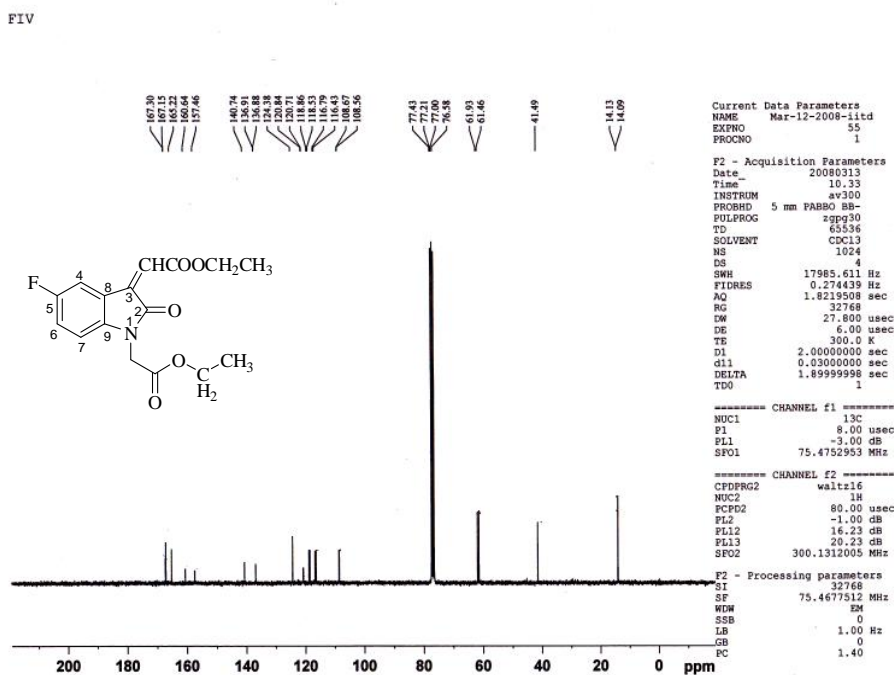

Supplementary Material (ESI) for Organic & Biomolecular Chemistry  
This journal is (c) The Royal Society of Chemistry 2011

$^1\text{H}$  NMR spectrum (Bruker AC-300 Avance, 300 MHz,  $\text{CDCl}_3$ ) of compound **3o**

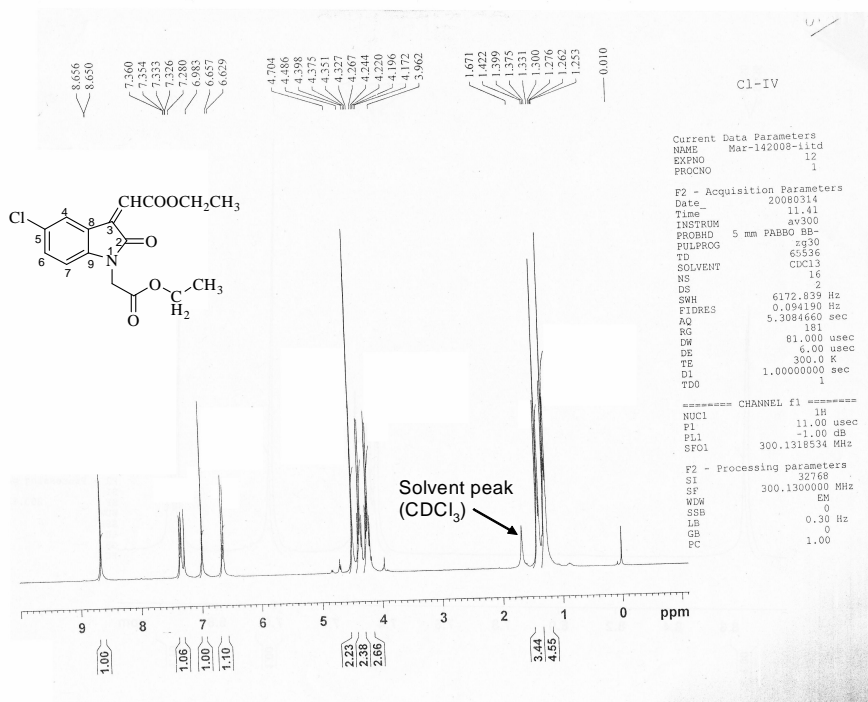

$^{13}\text{C}$  NMR spectrum (Bruker AC-300 Avance, 75.5 MHz,  $\text{CDCl}_3$ ) of compound **3o**

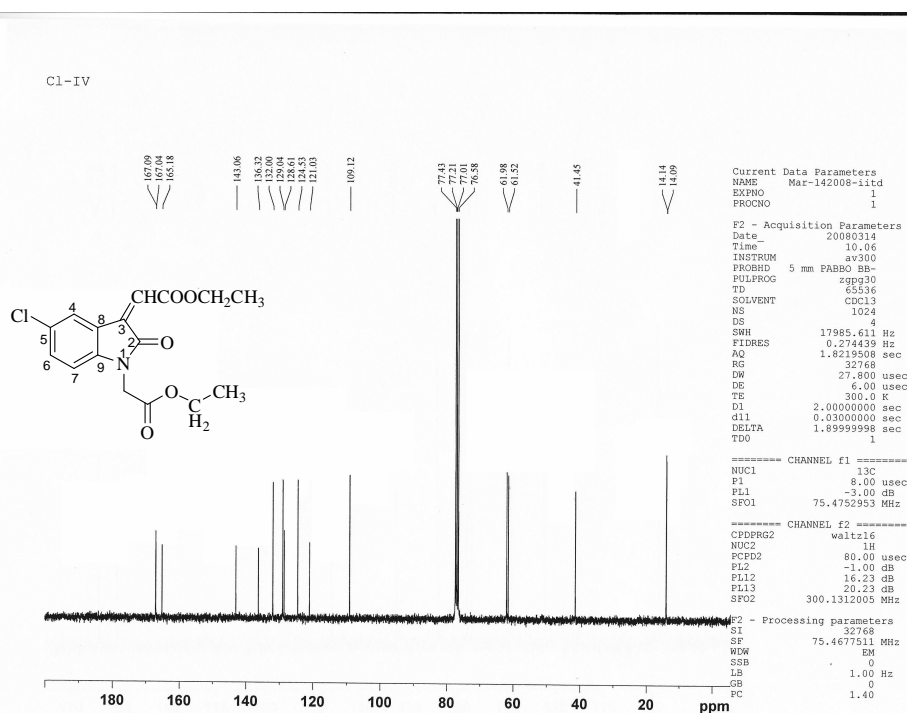

Supplementary Material (ESI) for Organic & Biomolecular Chemistry  
 This journal is (c) The Royal Society of Chemistry 2011

<sup>1</sup>H NMR spectrum (Bruker AC-300 Avance, 300 MHz, CDCl<sub>3</sub>) of compound **3p**

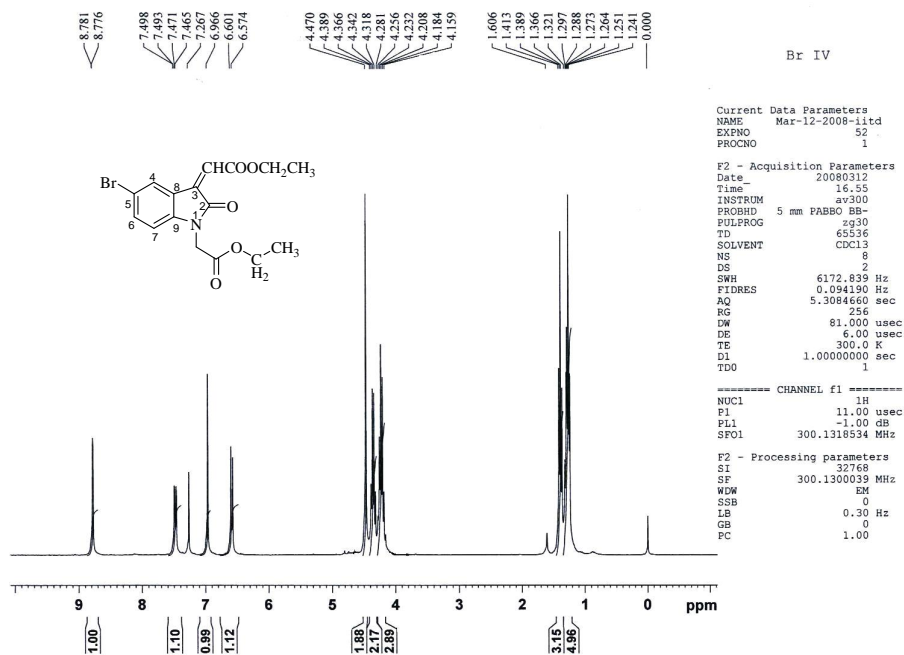

<sup>13</sup>C NMR spectrum (Bruker AC-300 Avance, 75.5 MHz, CDCl<sub>3</sub>) of compound **3p**

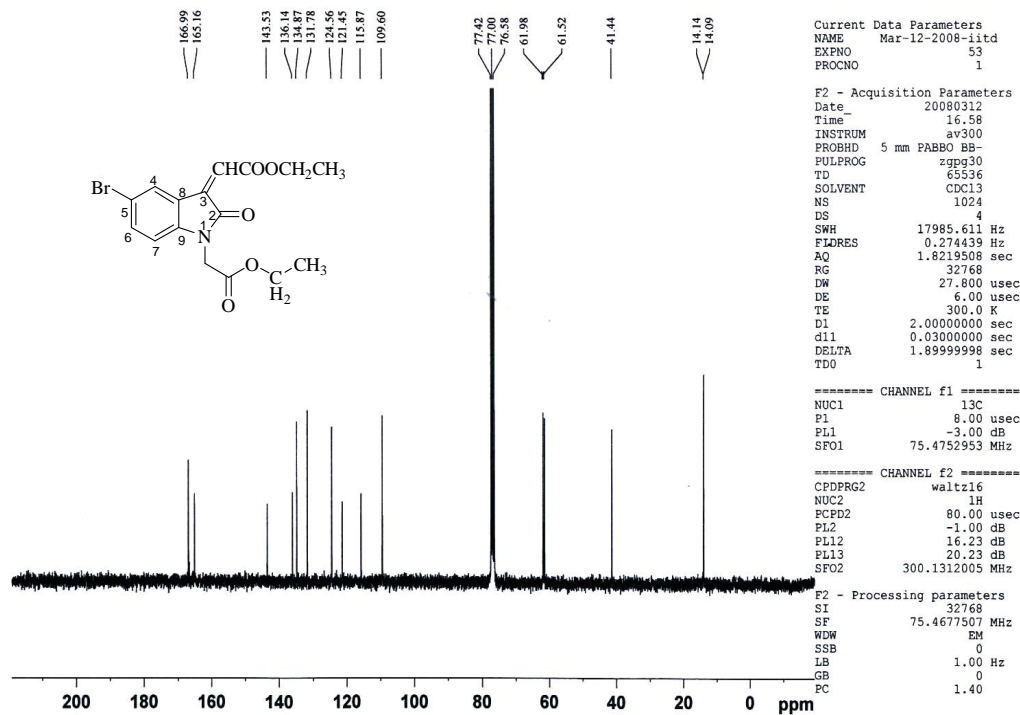

Supplementary Material (ESI) for Organic & Biomolecular Chemistry  
This journal is (c) The Royal Society of Chemistry 2011

NOE-<sup>1</sup>H NMR spectrum (Jeol-ECP 500, 500 MHz, CDCl<sub>3</sub>) of compound **2a**

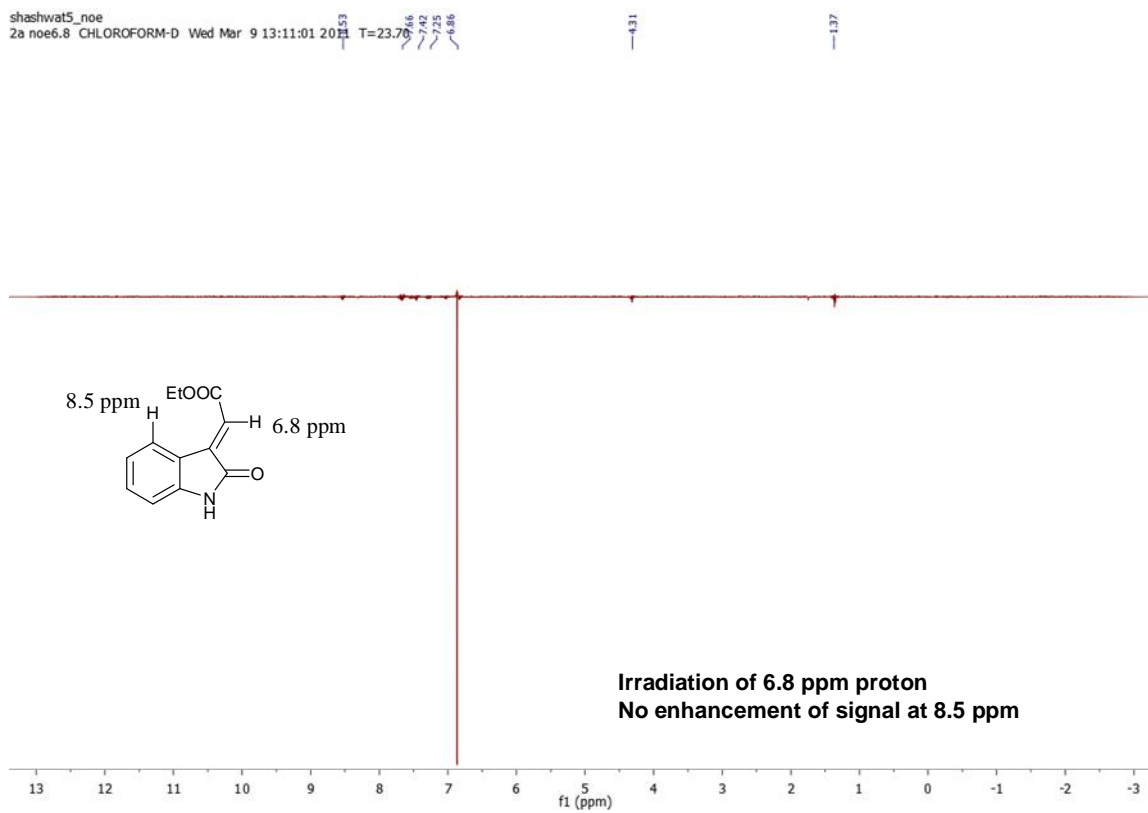



Supplementary Material (ESI) for Organic & Biomolecular Chemistry  
This journal is (c) The Royal Society of Chemistry 2011

NOE-<sup>1</sup>H NMR spectrum (Jeol-ECP 500, 500 MHz, CDCl<sub>3</sub>) of compound **2b**

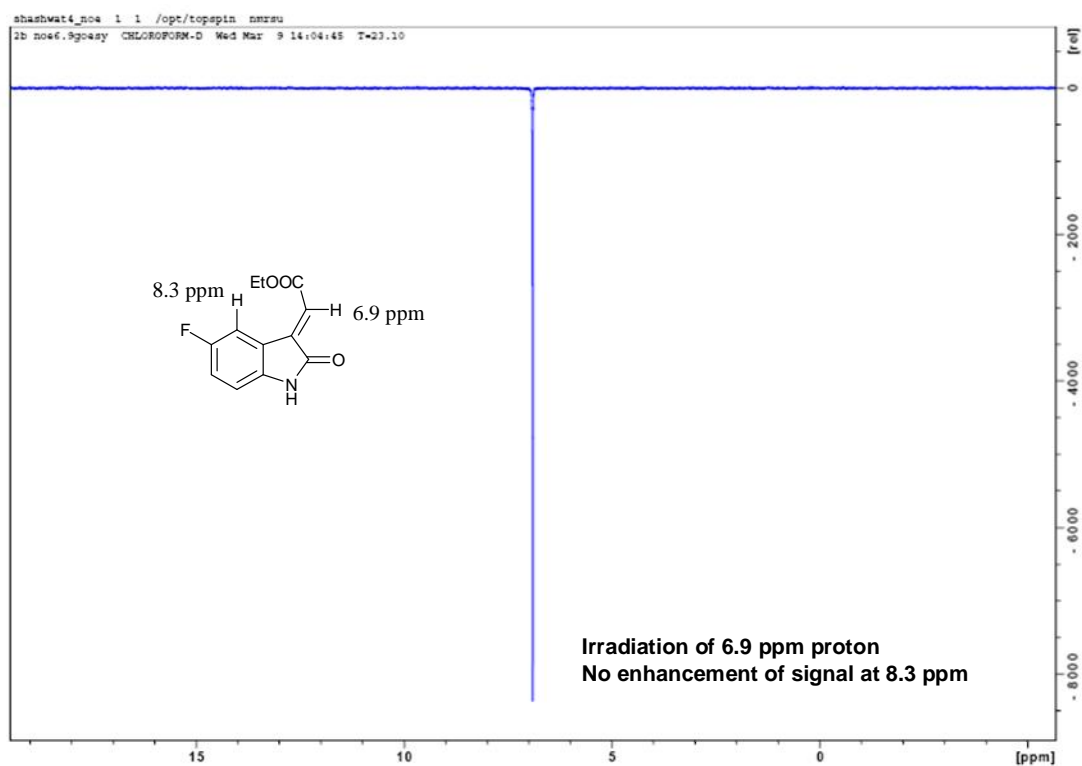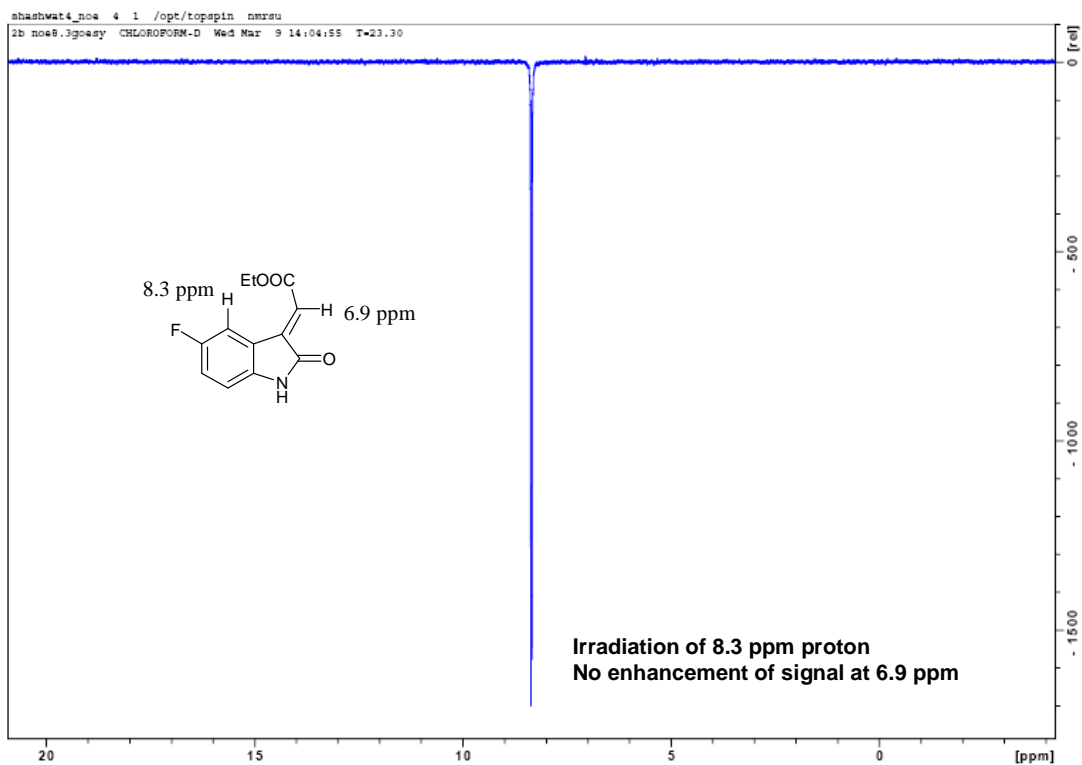

Supplementary Material (ESI) for Organic & Biomolecular Chemistry  
This journal is (c) The Royal Society of Chemistry 2011

NOE-<sup>1</sup>H NMR spectrum (Jeol-ECP 500, 500 MHz, CDCl<sub>3</sub>) of compound **2c**

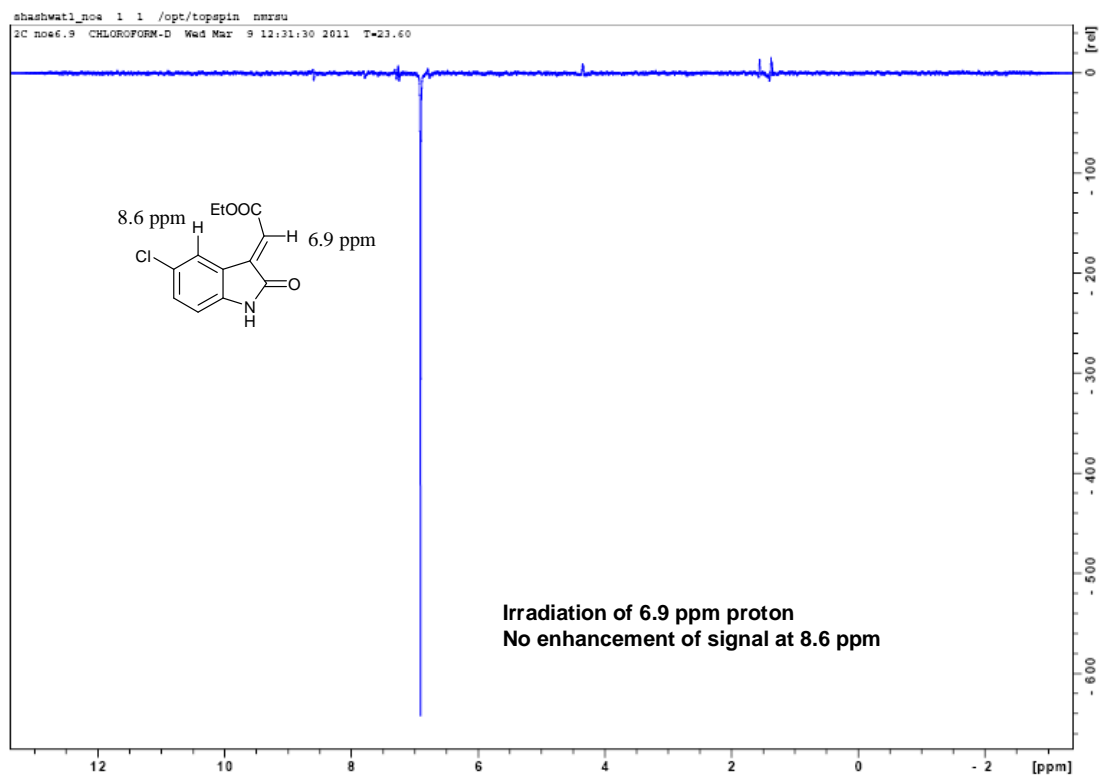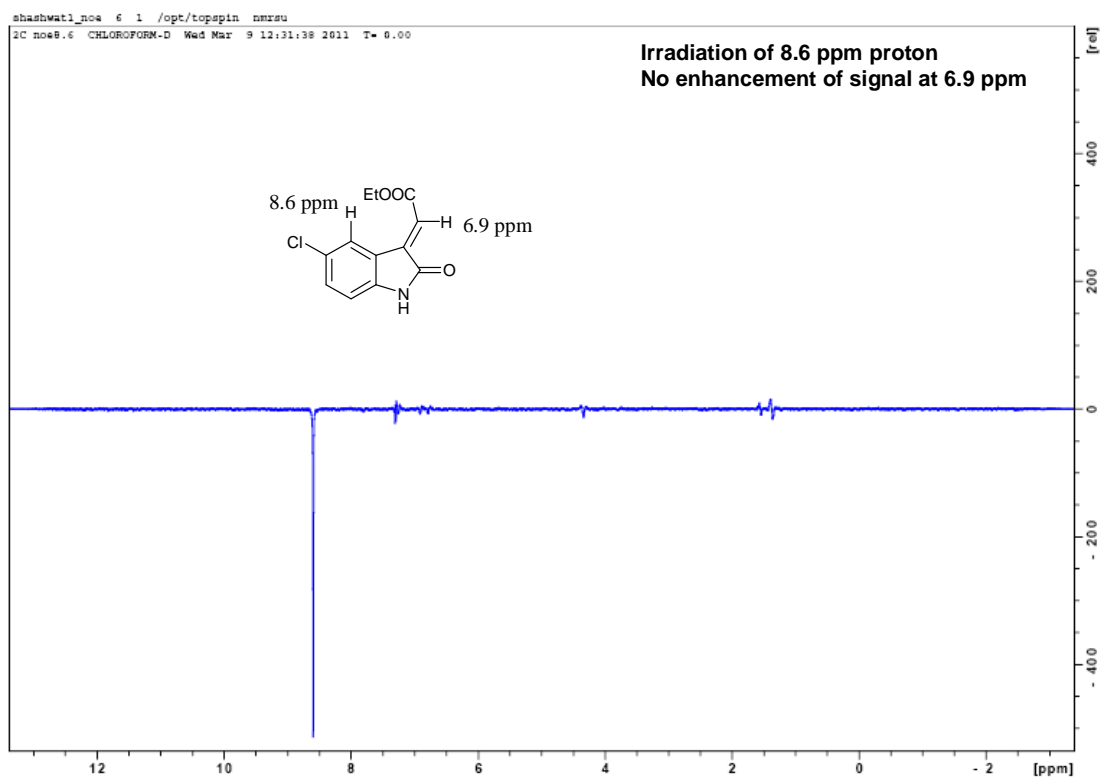

Supplementary Material (ESI) for Organic & Biomolecular Chemistry  
This journal is (c) The Royal Society of Chemistry 2011

NOE-<sup>1</sup>H NMR spectrum (Jeol-ECP 500, 500 MHz, CDCl<sub>3</sub>) of compound **2d**

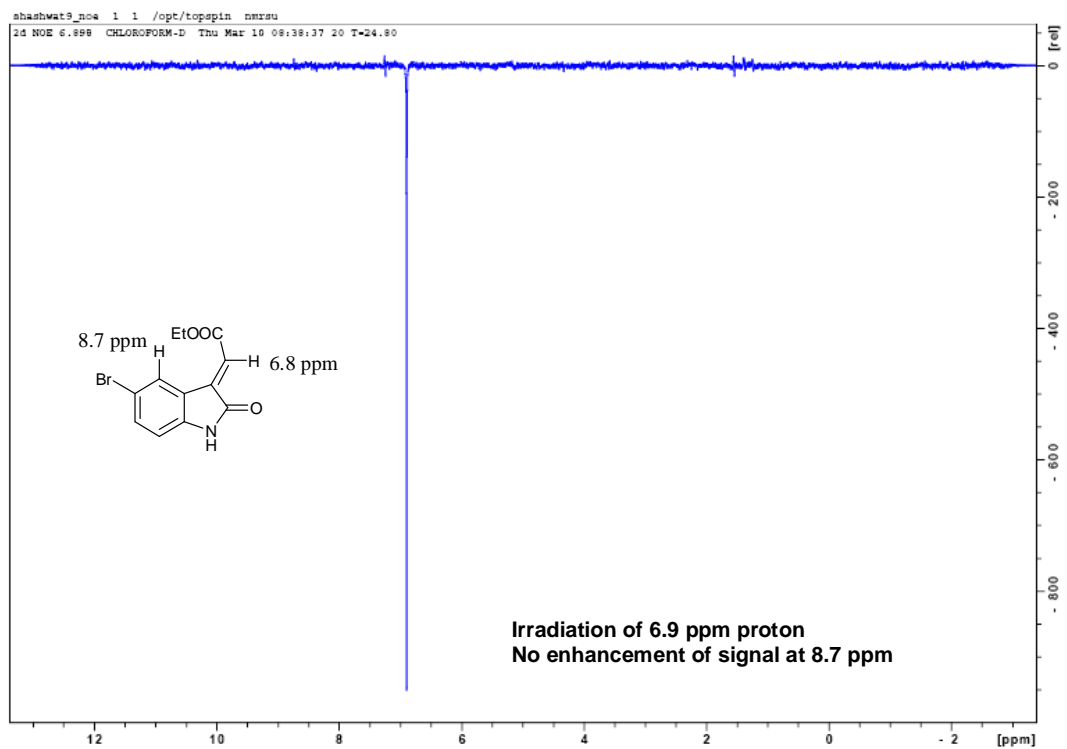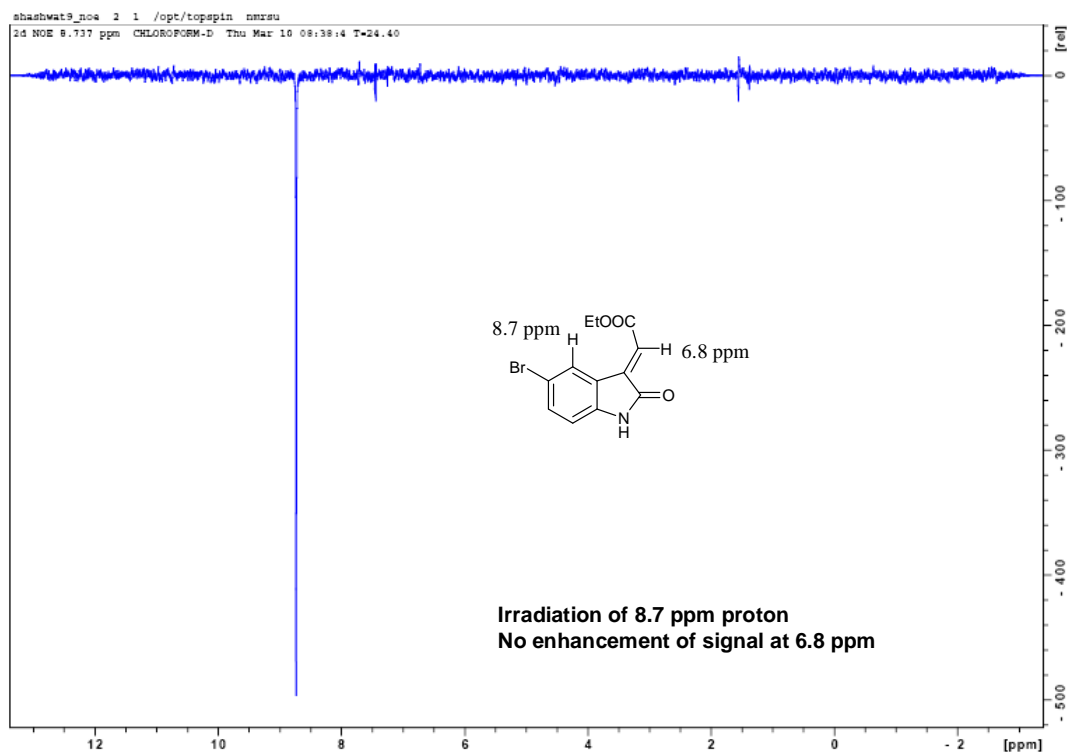

Supplementary Material (ESI) for Organic & Biomolecular Chemistry  
This journal is (c) The Royal Society of Chemistry 2011

NOESY-<sup>1</sup>H NMR spectrum (Bruker-400, 400 MHz, CDCl<sub>3</sub>) of compound **2a**

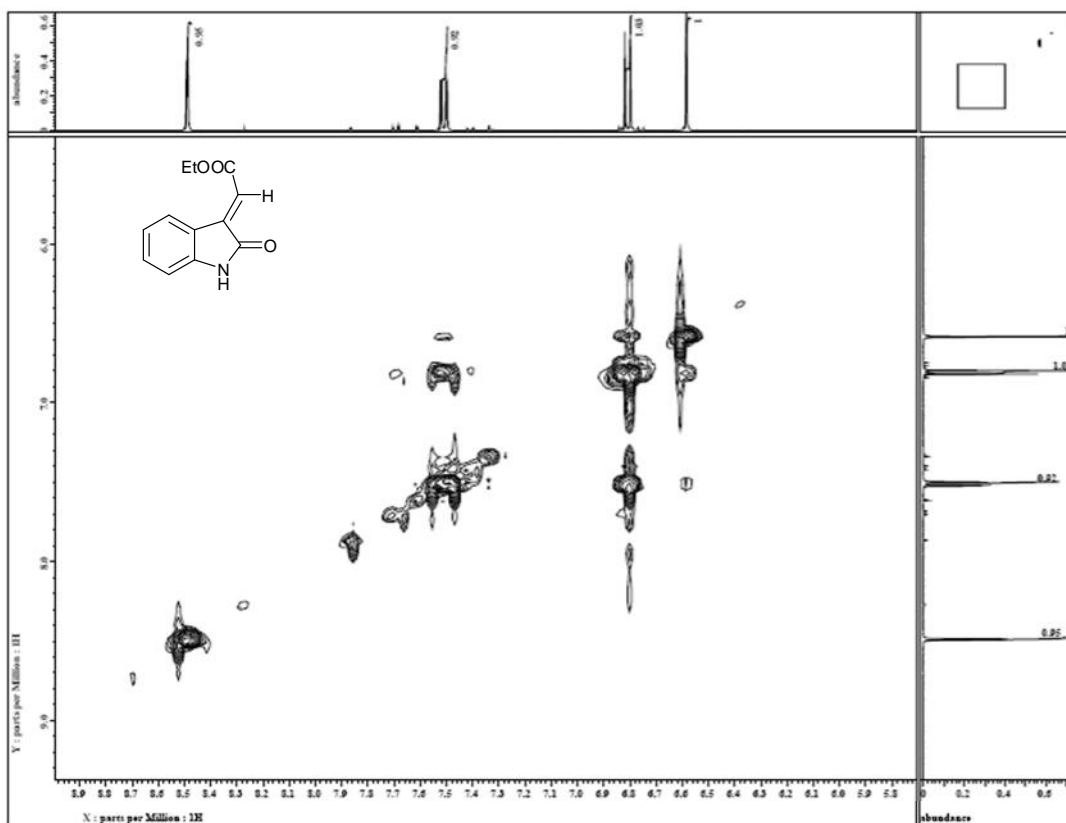

Supplementary Material (ESI) for Organic & Biomolecular Chemistry  
This journal is (c) The Royal Society of Chemistry 2011

NOESY-<sup>1</sup>H NMR spectrum (Bruker AV-700, 700 MHz, CDCl<sub>3</sub>) of compound **2b**

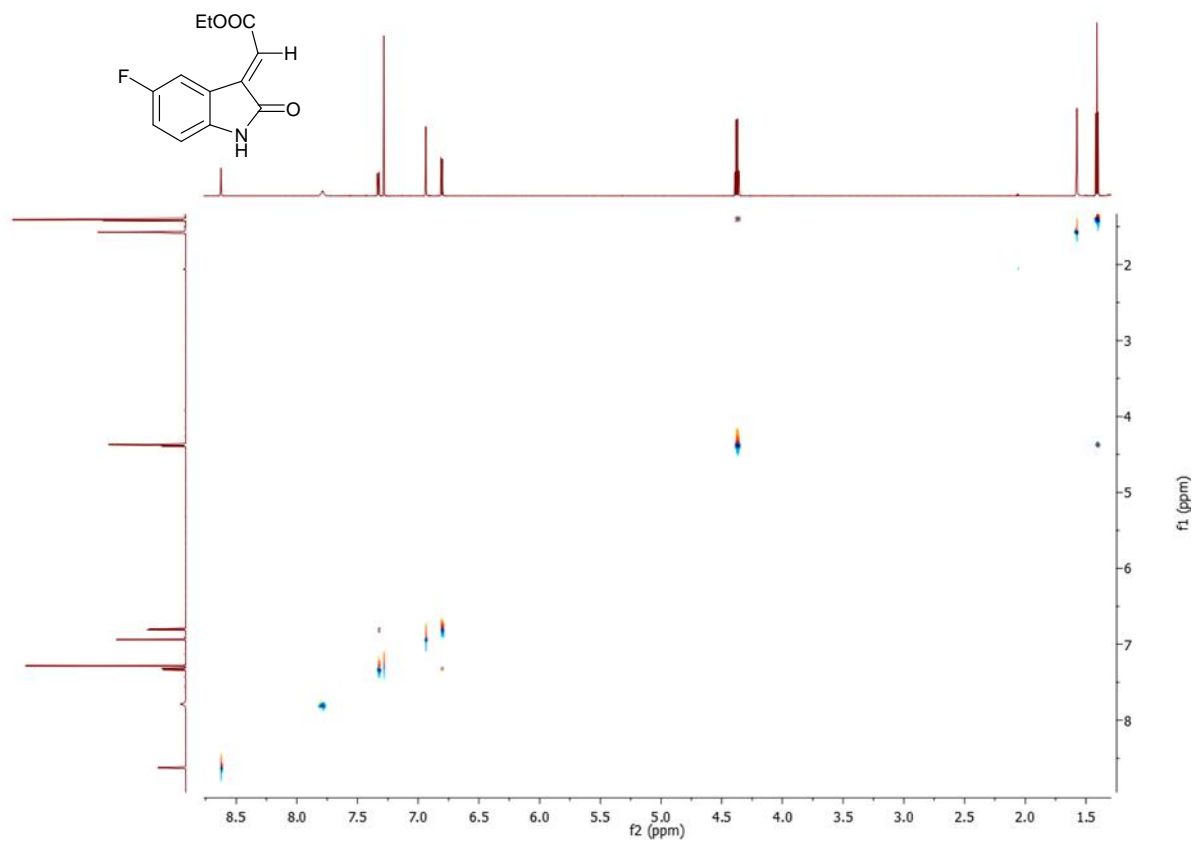

Supplementary Material (ESI) for Organic & Biomolecular Chemistry  
This journal is (c) The Royal Society of Chemistry 2011

NOESY-<sup>1</sup>H NMR spectrum (Bruker AV-700, 700 MHz, CDCl<sub>3</sub>) of compound **2c**

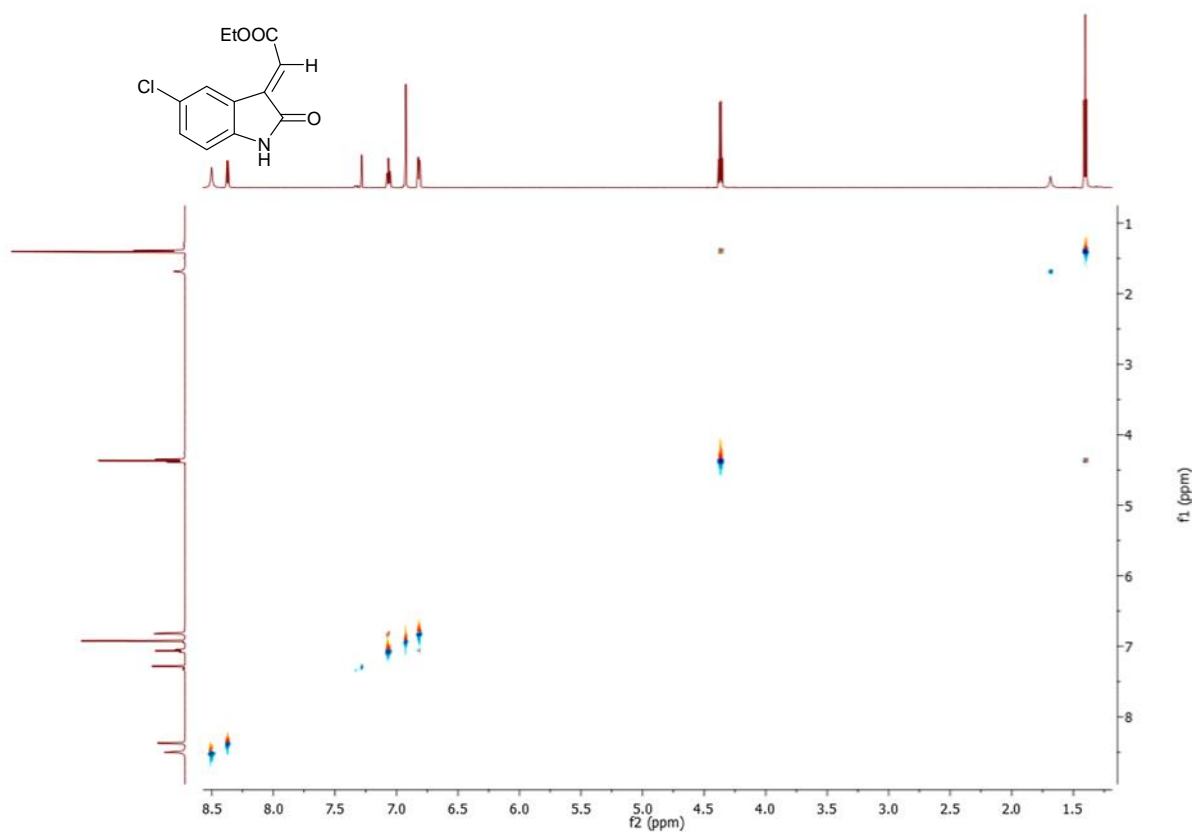

Supplementary Material (ESI) for Organic & Biomolecular Chemistry  
This journal is (c) The Royal Society of Chemistry 2011

NOESY-<sup>1</sup>H NMR spectrum (Jeol-ECP 500, 500 MHz, CDCl<sub>3</sub>) of compound **2d**

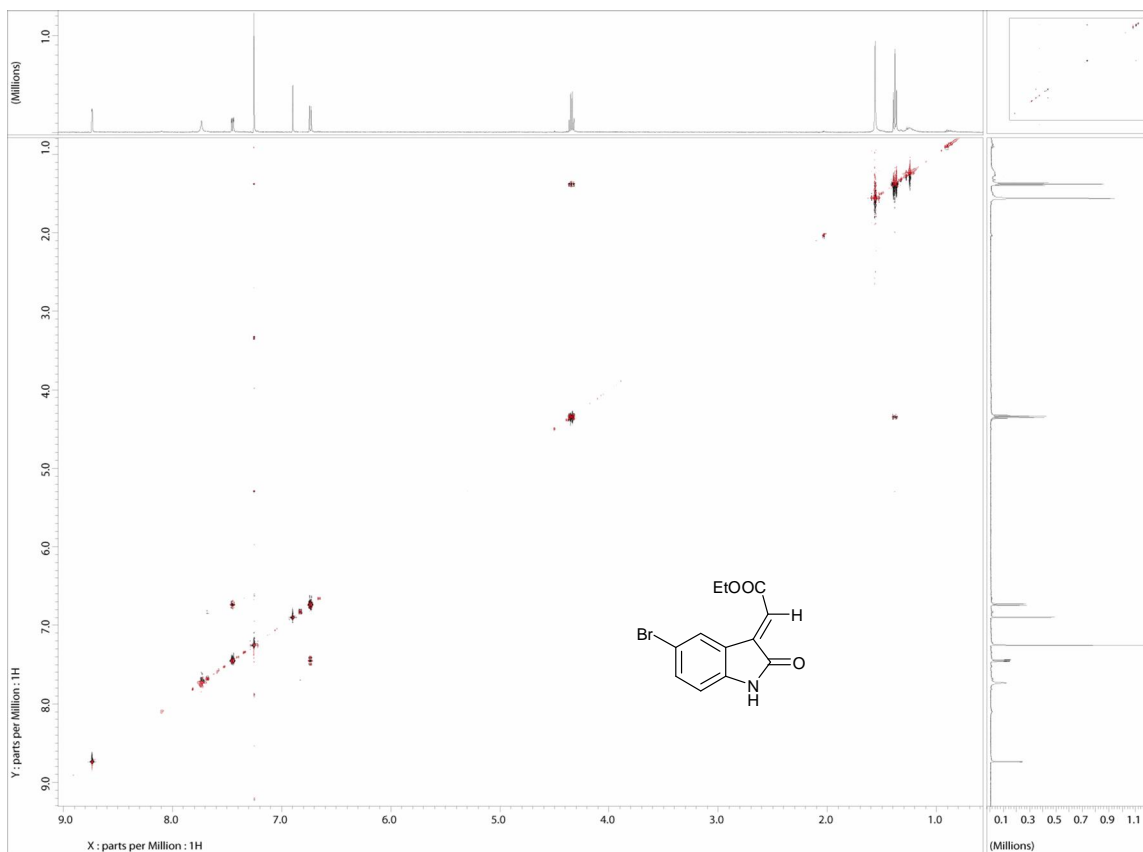

Supplement: c0md00262c.pdf [file c0md00262c.pdf]
